# Supplementary material
Source: PubMed Central journal article supplement (PMC6173300)
Supplement: NIHMS78635-supplement-Supplementary_figure_3.pdf [file NIHMS78635-supplement-Supplementary_figure_3.pdf]

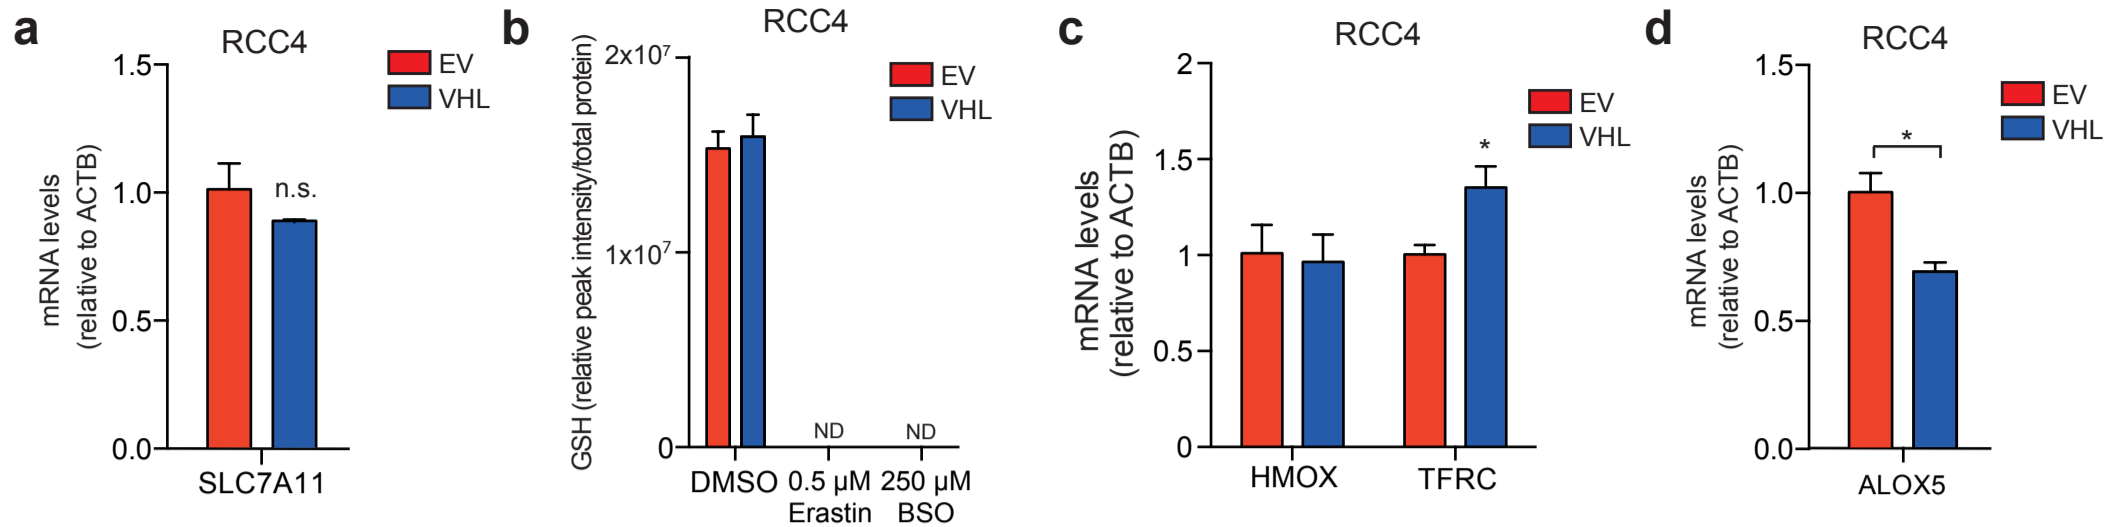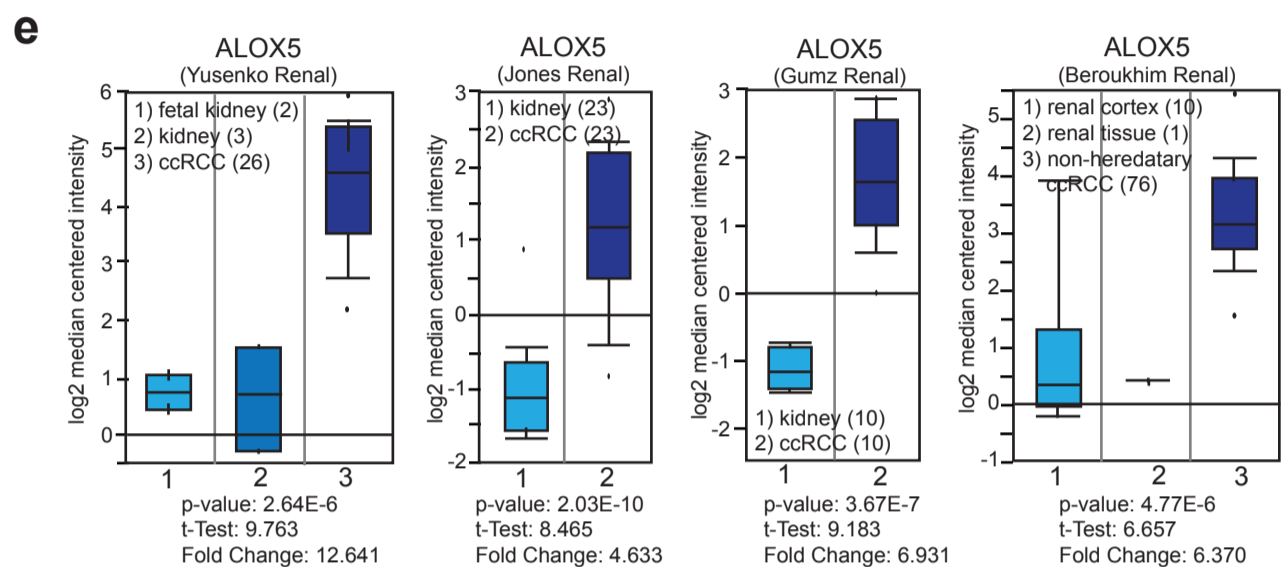

**f** GSEA RCC4 VHL vs. EV (Tang et al. 2016)

| NAME                                      | NES  | FDR q-val |
|-------------------------------------------|------|-----------|
| HALLMARK_INTERFERON_ALPHA_RESPONSE        | 2.07 | 0.000     |
| HALLMARK_INTERFERON_GAMMA_RESPONSE        | 1.67 | 0.032     |
| <b>HALLMARK_OXIDATIVE_PHOSPHORYLATION</b> | 1.45 | 0.150     |
| HALLMARK_REACTIVE_OXIGEN_SPECIES_PATHWAY  | 1.44 | 0.116     |
| HALLMARK_PROTEIN_SECRETION                | 1.42 | 0.108     |
| HALLMARK_ALLOGRAFT_REJECTION              | 1.33 | 0.191     |
| HALLMARK_ANGIOGENESIS                     | 1.29 | 0.213     |
| <b>HALLMARK_FATTY_ACID_METABOLISM</b>     | 1.27 | 0.218     |
| HALLMARK_P53_PATHWAY                      | 1.26 | 0.214     |
