# Supplementary material
Source: PubMed Central journal article supplement (PMC6173300)

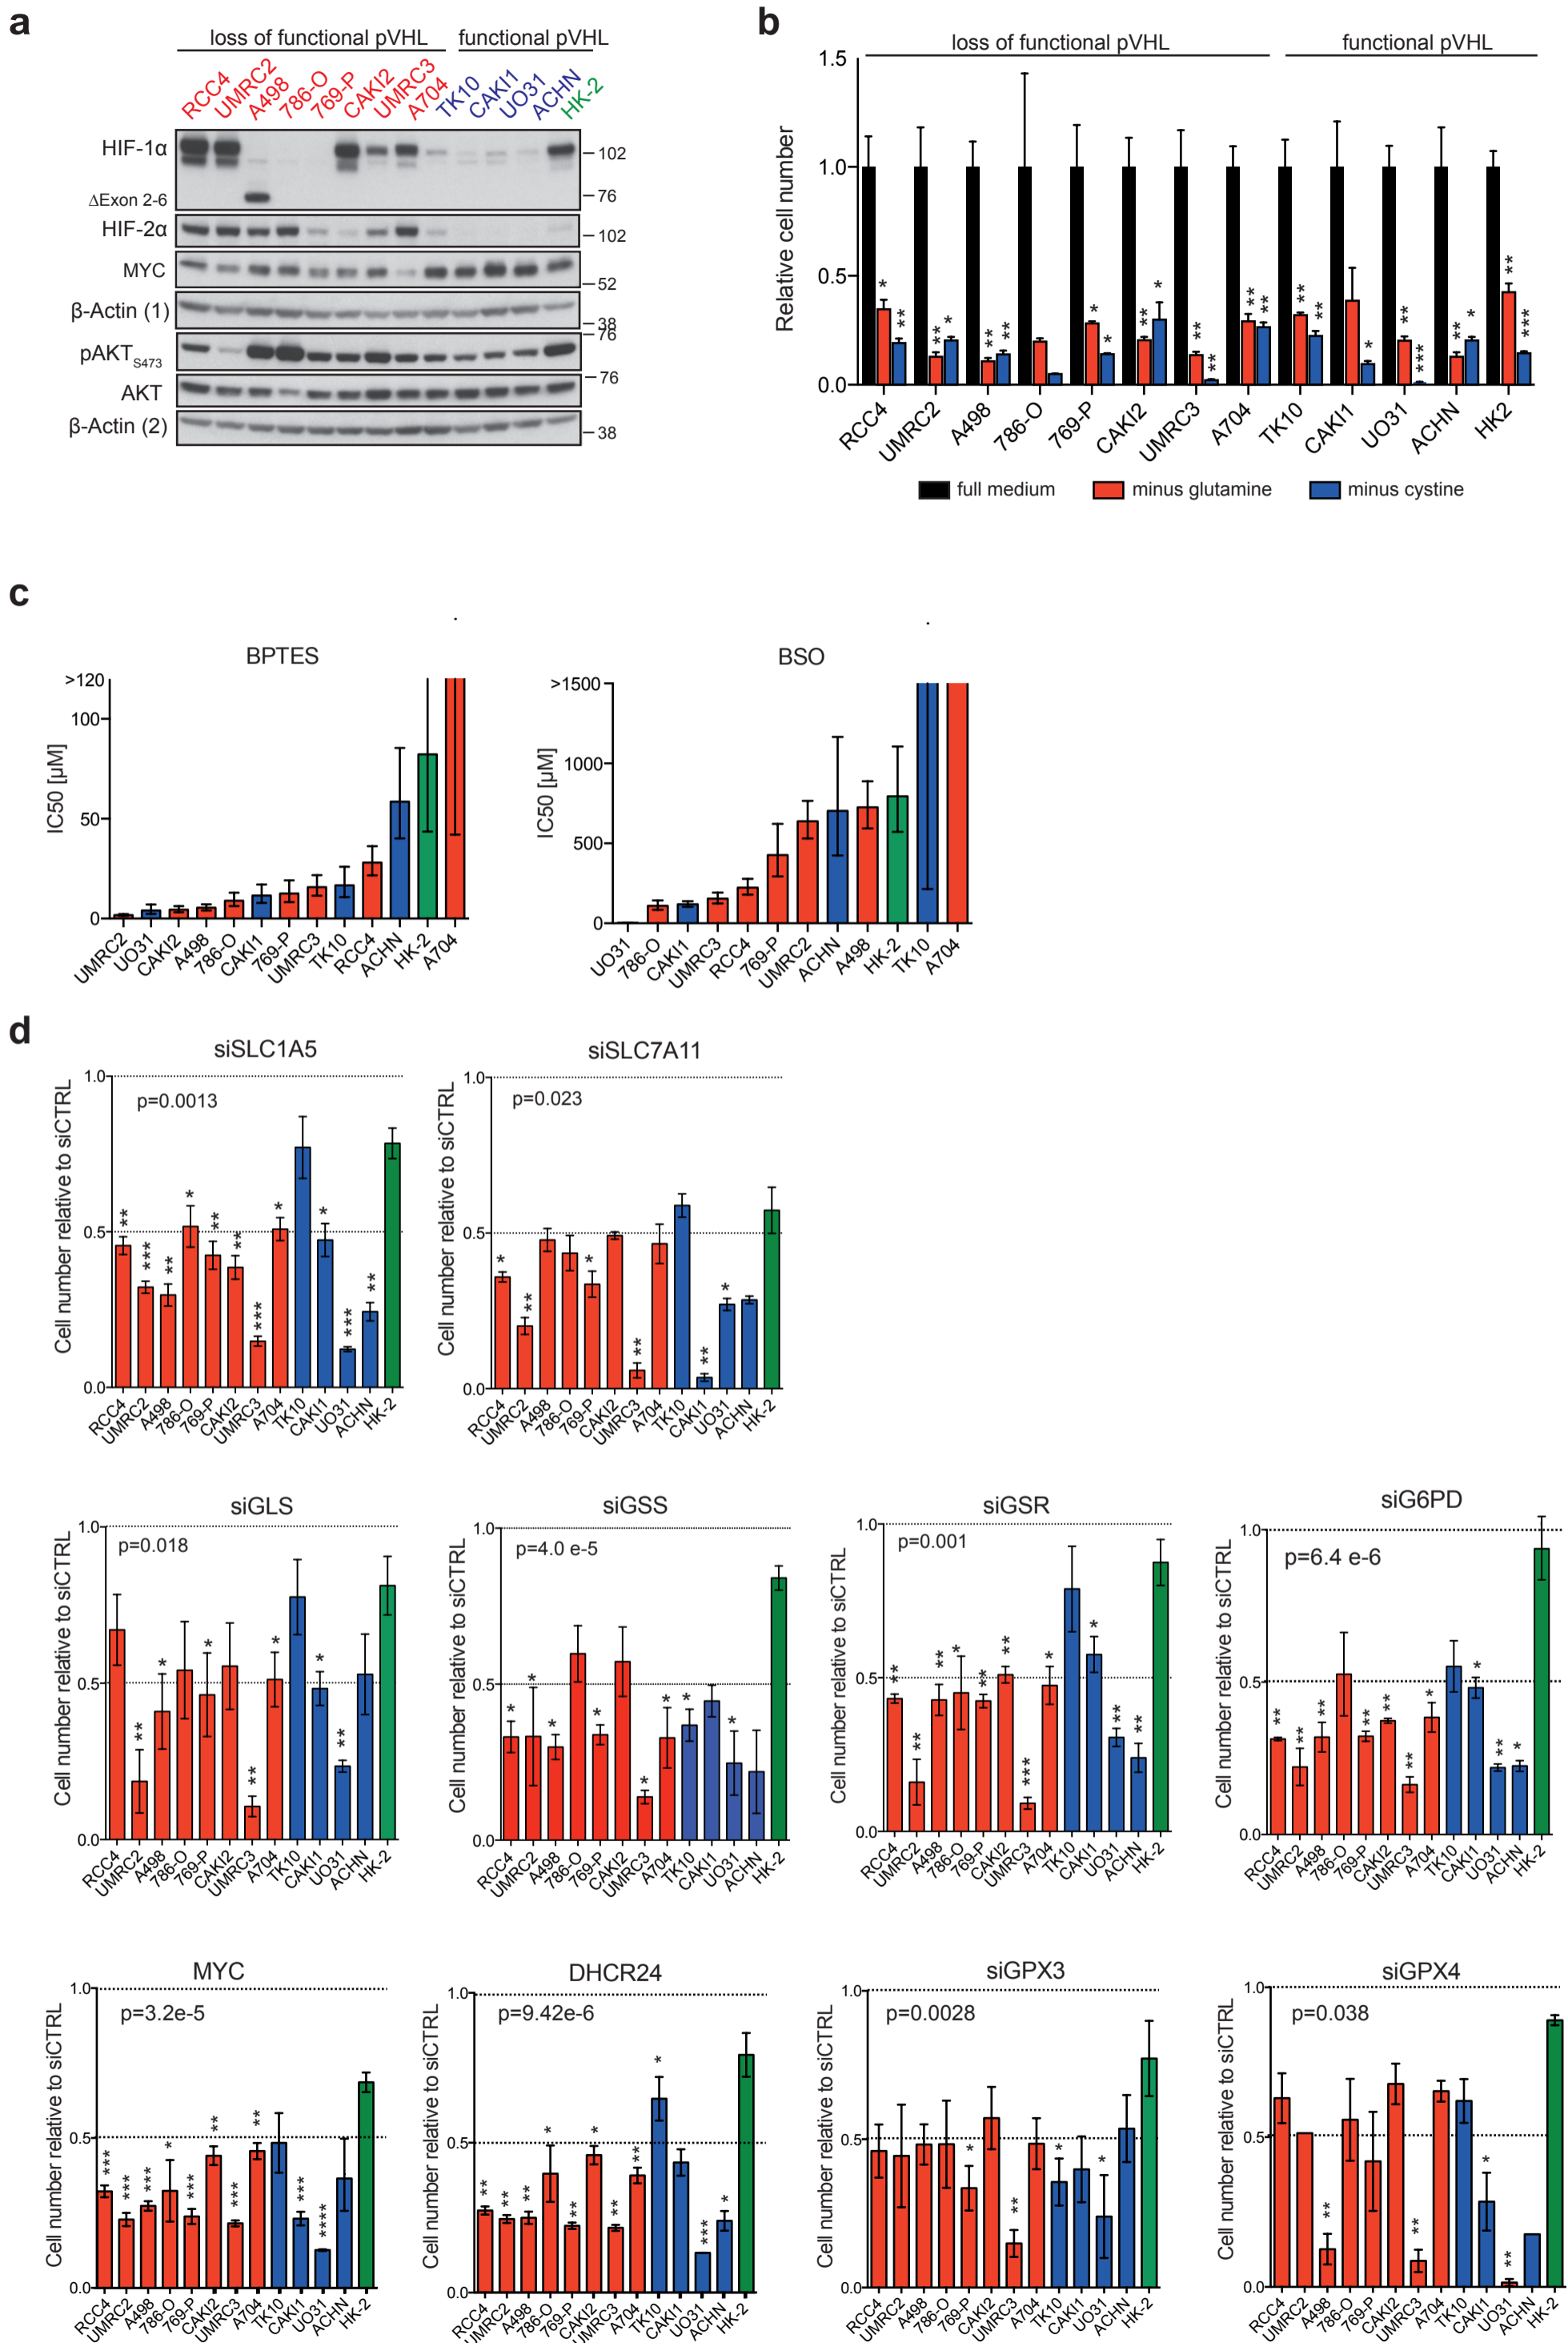

Supplement: NIHMS78635-supplement-Supplementary_figure_4.pdf [file NIHMS78635-supplement-Supplementary_figure_4.pdf]
